# Supplementary material
Source: publisher figshare collection journal article supplement (https://karger.figshare.com/ndownloader/files/14341544)

Research Article

# **ACT-FASTER, a Prospective Cohort Study Exploring Treatment Patterns with Fulvestrant and Exemestane in Postmenopausal Patients with Advanced Hormone Receptor-Positive Breast Cancer under Real-Life Conditions in Germany**

Nicolai Maass<sup>a</sup> Helmut Ostermann<sup>b</sup> Kurt Possinger<sup>c</sup> Peter Klein<sup>d</sup> Hans Tesch<sup>e</sup> Lars Mühlhoff<sup>f</sup> Dirk Bauerschlag<sup>a</sup>

<sup>a</sup>Klinik für Gynäkologie und Geburtshilfe, UKSH, Kiel, <sup>b</sup>Medizinische Klinik und Poliklinik III, Klinikum der Universität München-Grosshadern, München, <sup>c</sup>Medizinische Klinik mit Schwerpunkt Onkologie und Hämatologie, Charité Campus Mitte, Berlin, <sup>d</sup>d.s.h. Statistical Services GmbH, Rohrbach, <sup>e</sup>Onkologische Gemeinschaftspraxis, Frankfurt, and <sup>f</sup>Medical Affairs, AstraZeneca, Wedel, Germany

**Suppl. table 1.** Progression-free survival

| Analysis statistic                           | Fulvestrant          | Fulvestrant          | Fulvestrant          | Fulvestrant       | Exemestane       |
|----------------------------------------------|----------------------|----------------------|----------------------|-------------------|------------------|
|                                              | 1 <sup>st</sup> line | 2 <sup>nd</sup> line | 3 <sup>rd</sup> line | any line          | any line         |
|                                              | ( <i>n</i> = 176)    | ( <i>n</i> = 163)    | ( <i>n</i> = 93)     | ( <i>n</i> = 432) | ( <i>n</i> = 66) |
| Progression-free survival                    |                      |                      |                      |                   |                  |
| Patients with events, <i>n</i> (%)           | 104 (59.1)           | 100 (61.3)           | 61 (65.6)            | 265 (61.3)        | 20 (30.3)        |
| Censored patients, <i>n</i> (%)              | 72 (40.9)            | 63 (38.7)            | 32 (34.4)            | 167 (38.7)        | 46 (69.7)        |
| Quartiles                                    |                      |                      |                      |                   |                  |
| 25. percentile, months (95% CI)              | 4.4 (3.4–5.9)        | 3.5 (2.8–4.1)        | 3.3 (2.5–4.8)        | 3.9 (3.3–4.4)     | 9.9 (2.8–16.7)   |
| 50. percentile, months (95% CI)              | 9.1 (7.7–11.7)       | 6.8 (5.6–11.2)       | 6.7 (5.0–8.2)        | 8.0 (6.7–8.9)     | 25.4 (12.8---    |
| 75. percentile, months (95% CI)              | 24.8 (21.6–33.7)     | 19.7 (14.0---        | 11.1 (8.7–23.6)      | 22.7 (16.5–26.5)  | Not reached      |
| Time to onset of event <sup>a</sup>          |                      |                      |                      |                   |                  |
| 6 months                                     | 67.9 (92)            | 54.4 (71)            | 55.1 (40)            | 60.3 (204)        | 83.2 (38)        |
| 12 months                                    | 41.8 (50)            | 40.5 (43)            | 24.5 (14)            | 37.3 (107)        | 68.4 (23)        |
| 18 months                                    | 35.5 (32)            | 28.7 (20)            | 17.3 (7)             | 29.3 (59)         | 60.8 (14)        |
| 24 months                                    | 25.5 (16)            | 20.8 (10)            | 13.9 (3)             | 21.4 (29)         | 55.7 (8)         |
| 30 months                                    | 18.9 (9)             | 15.6 (4)             | 13.9 (0)             | 16.2 (13)         | 30.9 (2)         |
| <i>p</i> -value (log-rank)                   |                      |                      | <i>p</i> < 0.0001    |                   |                  |
| Overall: 3 lines for Fulvestrant, exemestane |                      |                      |                      |                   |                  |
| <i>CI</i> confidence interval                |                      |                      |                      |                   |                  |

<sup>a</sup> Percentage of patients without event at the respective time points is summarised with Kaplan–Meier estimates and (number at risk)

**Suppl. table 2.** Tumor response

|                                                   | <b>Fulvestrant</b><br><b>1<sup>st</sup> line</b><br><b>(n = 176)</b> | <b>Fulvestrant</b><br><b>2<sup>nd</sup> line</b><br><b>(n = 163)</b> | <b>Fulvestrant</b><br><b>3<sup>rd</sup> line</b><br><b>(n = 93)</b> | <b>Fulvestrant</b><br><b>any line</b><br><b>(n = 432)</b> | <b>Exemestane</b><br><b>any line</b><br><b>(n = 66)</b> |
|---------------------------------------------------|----------------------------------------------------------------------|----------------------------------------------------------------------|---------------------------------------------------------------------|-----------------------------------------------------------|---------------------------------------------------------|
| <b>Objective response (CR/PR)</b>                 |                                                                      |                                                                      |                                                                     |                                                           |                                                         |
| Patients without objective response, <i>n</i> (%) | 132 (75.0%)                                                          | 148 (90.8%)                                                          | 83 (89.2%)                                                          | 363 (84.0%)                                               | 58 (87.9%)                                              |
| Patients with objective response, <i>n</i> (%)    | 44 (25.0%)                                                           | 15 (9.2%)                                                            | 10 (10.8%)                                                          | 69 (16.0%)                                                | 8 (12.1%)                                               |
| <b>Clinical benefit (CR/PR/SD)</b>                |                                                                      |                                                                      |                                                                     |                                                           |                                                         |
| Patients without clinical benefit, <i>n</i> (%)   | 125 (71.0%)                                                          | 124 (76.1%)                                                          | 70 (75.3%)                                                          | 319 (73.8%)                                               | 46 (69.7%)                                              |
| Patients with clinical benefit, <i>n</i> (%)      | 51 (29.0%)                                                           | 39 (23.9%)                                                           | 23 (24.7%)                                                          | 113 (26.2%)                                               | 20 (30.3%)                                              |

*CR* complete response, *PR* partial response

If at a visit results were reported from more than one assessment method, the most unfavourable result was used for the analysis

**Suppl. table 3.** Number of patients with AEs, SAEs and ADRs

| Patients, <i>n</i> (%)                                              | Fulvestrant<br>1 <sup>st</sup> line<br>( <i>n</i> = 176) | Fulvestrant<br>2 <sup>nd</sup> line<br>( <i>n</i> = 163) | Fulvestrant<br>3 <sup>rd</sup> line<br>( <i>n</i> = 93) | Fulvestrant<br>any line<br>( <i>n</i> = 432) | Exemestane<br>any line<br>( <i>n</i> = 66) |
|---------------------------------------------------------------------|----------------------------------------------------------|----------------------------------------------------------|---------------------------------------------------------|----------------------------------------------|--------------------------------------------|
| Number of patients with                                             |                                                          |                                                          |                                                         |                                              |                                            |
| Adverse events (AE and SAE data combined)                           | 52 (29.5%)                                               | 35 (21.5%)                                               | 23 (24.7%)                                              | 110 (25.5%)                                  | 18 (27.3%)                                 |
| Drug related AEs (AE and SAE data combined)                         | 22 (12.5%)                                               | 22 (13.5%)                                               | 13 (14.0%)                                              | 57 (13.2%)                                   | 12 (18.2%)                                 |
| Serious AEs (AE and SAE data combined)                              | 33 (18.8%)                                               | 17 (10.4%)                                               | 11 (11.8%)                                              | 61 (14.1%)                                   | 9 (13.6%)                                  |
| Serious AEs (AE data only)*                                         | 8 (4.5%)                                                 | 3 (1.8%)                                                 | 2 (2.2%)                                                | 13 (3.0%)                                    | 3 (4.5%)                                   |
| Drug related serious AEs (AE and SAE data combined)                 | 3 (1.7%)                                                 | 2 (1.2%)                                                 | 1 (1.1%)                                                | 6 (1.4%)                                     | 1 (1.5%)                                   |
| AEs leading to treatment discontinuation (AE and SAE data combined) | 8 (4.5%)                                                 | 4 (2.5%)                                                 | 3 (3.2%)                                                | 15 (3.5%)                                    | 5 (7.6%)                                   |
| Study discontinuation due to AE reported                            | 2 (1.1%)                                                 | 2 (1.2%)                                                 | 3 (3.2%)                                                | 7 (1.6%)                                     | 1 (1.5%)                                   |
| One patient with no referring AE or SAE**                           | 1 (0.6%)                                                 | 0 (0.0%)                                                 | 0 (0.0%)                                                | 1 (0.2%)                                     | 0 (0.0%)                                   |
| Serious AEs with fatal outcome                                      | 12 (6.8%)                                                | 4 (2.5%)                                                 | 1 (1.1%)                                                | 17 (3.9%)                                    | 0 (0.0%)                                   |

AE adverse event, SAE serious adverse event, \*AEs and SAEs were documented on separate forms. For SAEs documented in AE data only, seriousness was mentioned in AE form, but no corresponding SAE form was filled.

\*\*For one patient therapy discontinuation due to an AE was documented, however no corresponding AE/SAE form was filled.

**Suppl. table 4.** Most frequently reported AEs related to treatment with fulvestrant or exemestane (AE and SAE data combined) – incidence of AE by group

| Patients, <i>n</i> (%)                                     | Fulvestrant<br>1 <sup>st</sup> line<br>( <i>n</i> = 176) | Fulvestrant<br>2 <sup>nd</sup> line<br>( <i>n</i> = 163) | Fulvestrant<br>3 <sup>rd</sup> line<br>( <i>n</i> = 93) | Fulvestrant<br>any line<br>( <i>n</i> = 432) | Exemestane<br>any line<br>( <i>n</i> = 66) |
|------------------------------------------------------------|----------------------------------------------------------|----------------------------------------------------------|---------------------------------------------------------|----------------------------------------------|--------------------------------------------|
| Gastrointestinal disorders                                 | 6 (3.4%)                                                 | 4 (2.5%)                                                 | 3 (3.2%)                                                | 13 (3.0%)                                    | 2 (3.0%)                                   |
| General disorders and<br>administration site<br>conditions | 5 (2.8%)                                                 | 9 (5.5%)                                                 | 2 (2.2%)                                                | 16 (3.7%)                                    | 4 (6.1%)                                   |
| Musculoskeletal and<br>connective tissue disorders         | 6 (3.4%)                                                 | 10 (6.1%)                                                | 1 (1.1%)                                                | 17 (3.9%)                                    | 5 (7.6%)                                   |
| Skin and subcutaneous<br>tissue disorders                  | 7 (4.0%)                                                 | 1 (0.6%)                                                 | 4 (4.3%)                                                | 12 (2.8%)                                    | 2 (3.0%)                                   |

*AE* adverse event, *SAE* serious adverse event

Each group counted only once per patient

**Suppl. fig. 1.** Patient distribution.

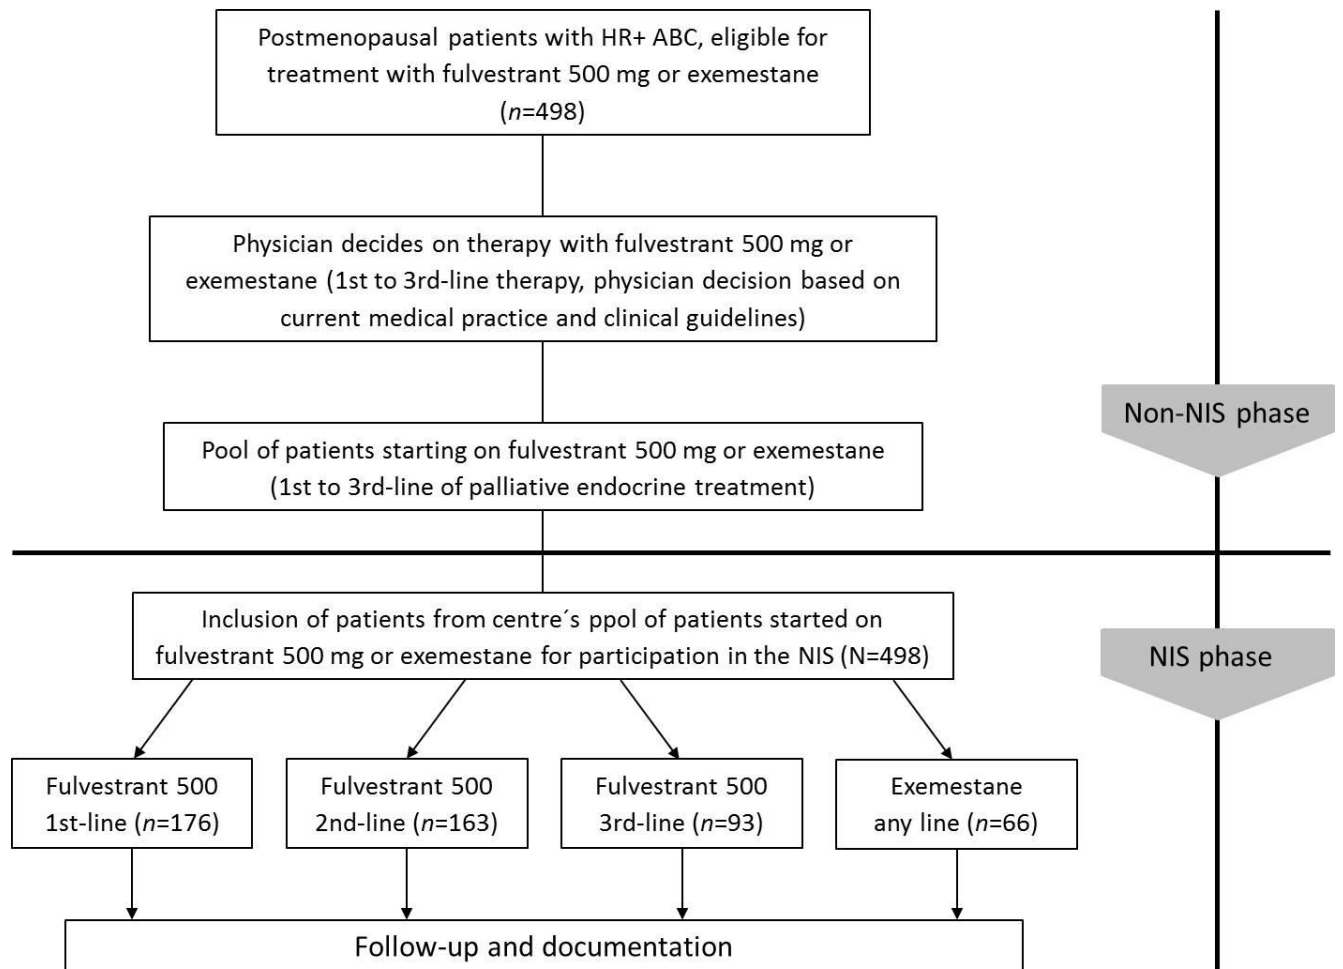

**Suppl. fig. 2.** Proportion of patients treated by therapy and treatment line.

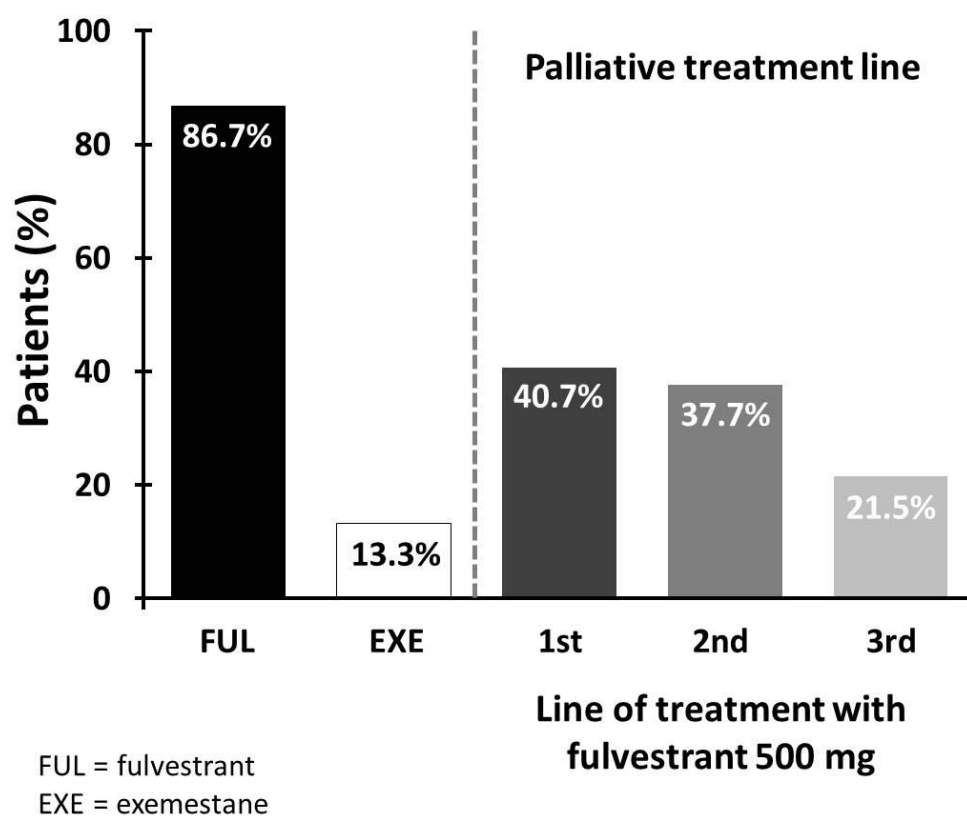

Supplement: Supplementary file 1 [file 14341544]
